# Supplementary material for: Field-based hearing measurements of two seabird species
Source: Oxford University Press journal article supplement (doi:10.1242/jeb.190710), 2019-02-15

**Fig. S1.** Recording of stimuli at the experimental site from the position of the bird. Spectra shown are (A) the broadband pulse and tones at 1, 2 and 4 kHz (B, C, and D respectively).

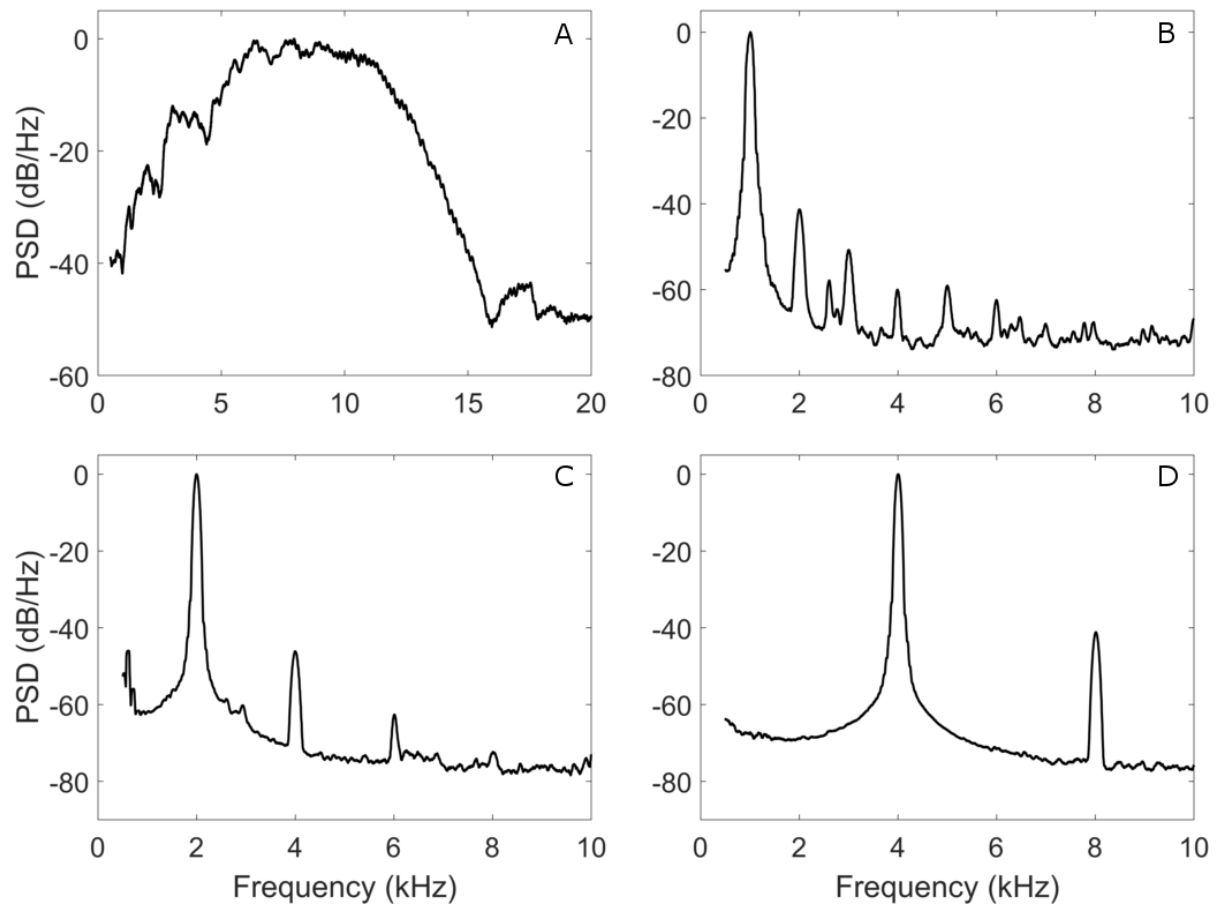

Supplement: jeb190710supp.pdf [file jeb190710supp.pdf]
